# Supplementary material for: Supplementing L-Citrulline Can Extend Lifespan in C. elegans and Attenuate the Development of Aging-Related Impairments of Glucose Tolerance and Intestinal Barrier in Mice
Source: MDPI journal article supplement (doi:10.3390/biom13111579), 2023-10-26
Supplement: s1 [file s1]

## Supplementary Materials

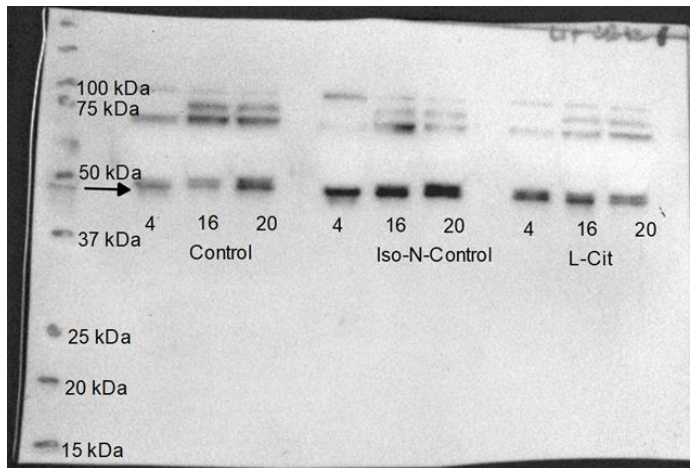

### Representative picture

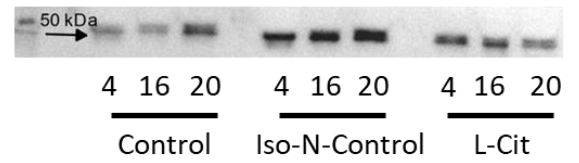

**Figure S1.** Uncropped blot and representative picture of p16 in western blot of plasma in Figure 3e. L-Cit, L-Citrulline; Iso-N-control, hydrolyzed soy protein.

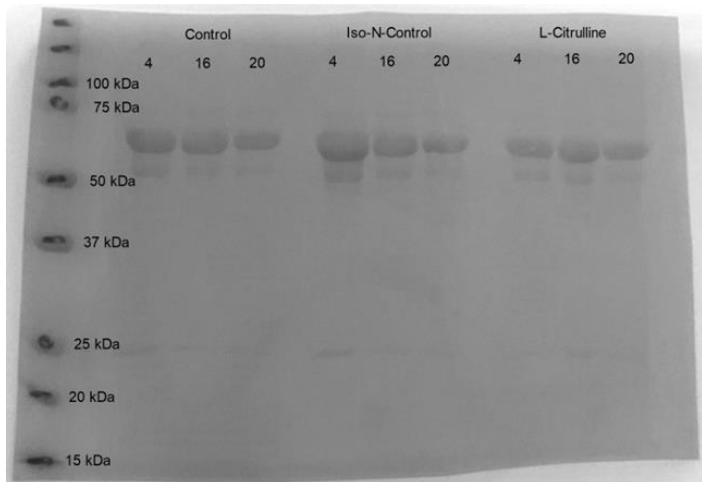

### Representative picture

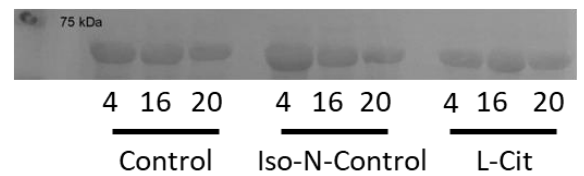

**Figure S2.** Ponceau and representative picture of Ponceau of p16 and CRP in Figure 3e. L-Cit, L-Citrulline; Iso-N-control, hydrolyzed soy protein.

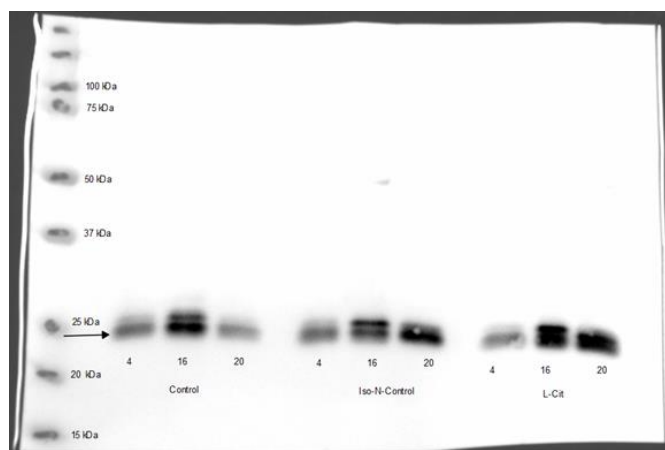

Representative picture

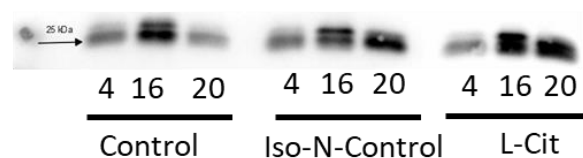

**Figure S3. Uncropped blot and representative picture of CRP in western blot of plasma in Figure 3e. L-Cit, L-Citrulline; Iso-N-control, hydrolyzed soy protein.**

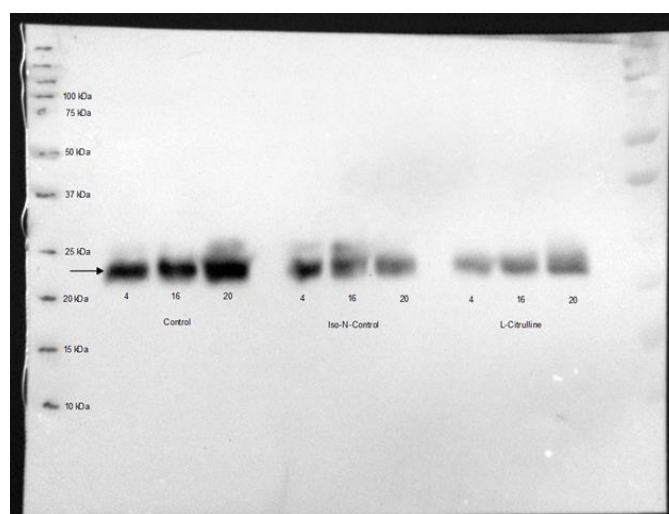

Representative picture

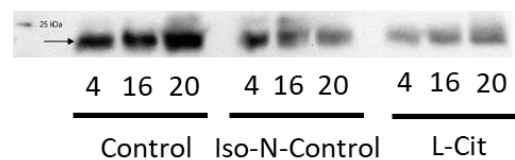

**Figure S4. Uncropped blot and representative picture of IL6 in western blot of plasma in Figure 3e. L-Cit, L-Citrulline; Iso-N-control, hydrolyzed soy protein.**

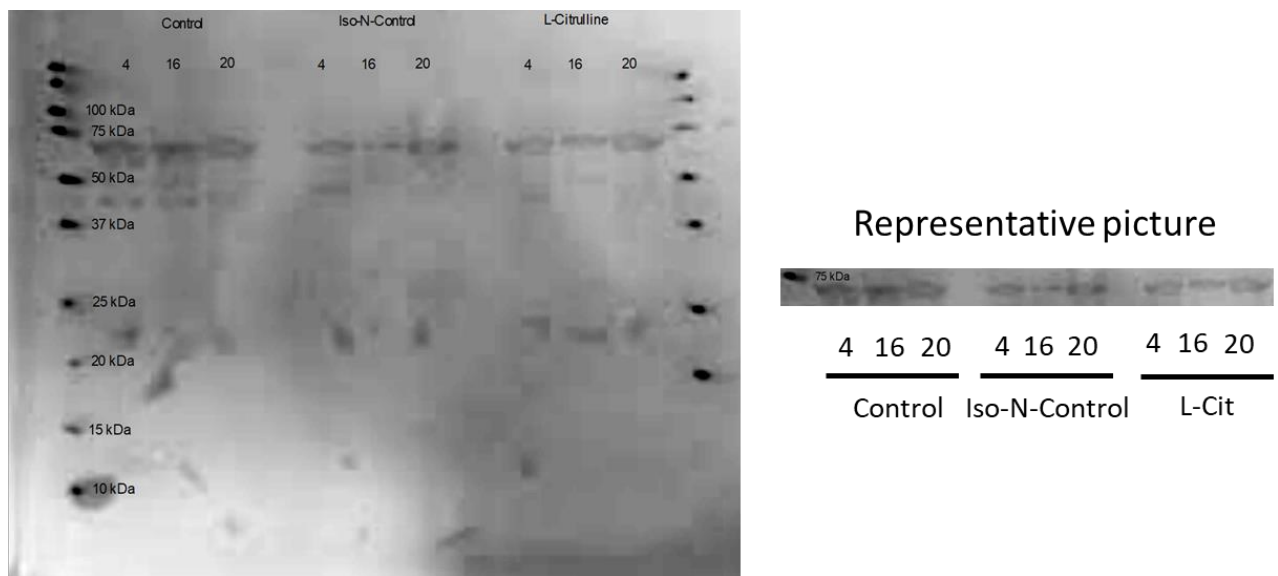

**Figure S5. Ponceau and representative picture of Ponceau of IL6 in Figure 3e.** L-Cit, L-Citrulline; Iso-N-control, hydrolyzed soy protein.

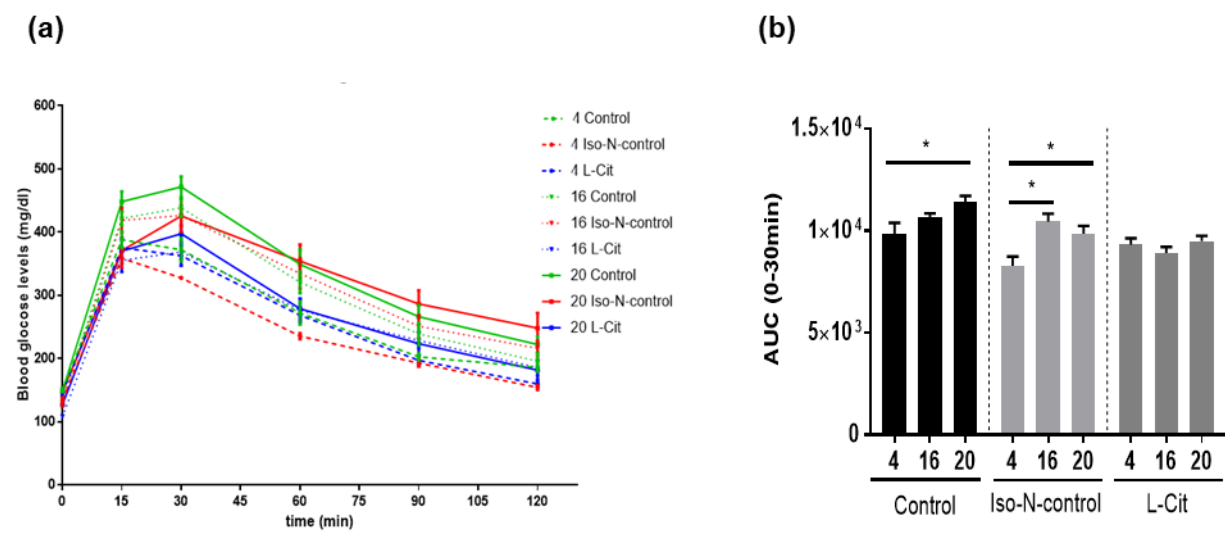

**Figure S6. Effect of enriching drinking water with L-Cit or hydrolyzed soy protein (=Iso-N-control) on blood glucose levels in 4-, 16- and 20-months old C57BL/6J mice.** (a) Blood glucose levels of GTT and (b) quantitative analysis of area under the curve (AUC) during GTT (0-30 min). Data are presented as means  $\pm$  SEM, \*  $p \leq 0.05$ . Iso-N-control, hydrolyzed soy protein; L-Cit, L-Citrulline; GTT, glucose-tolerance-test.

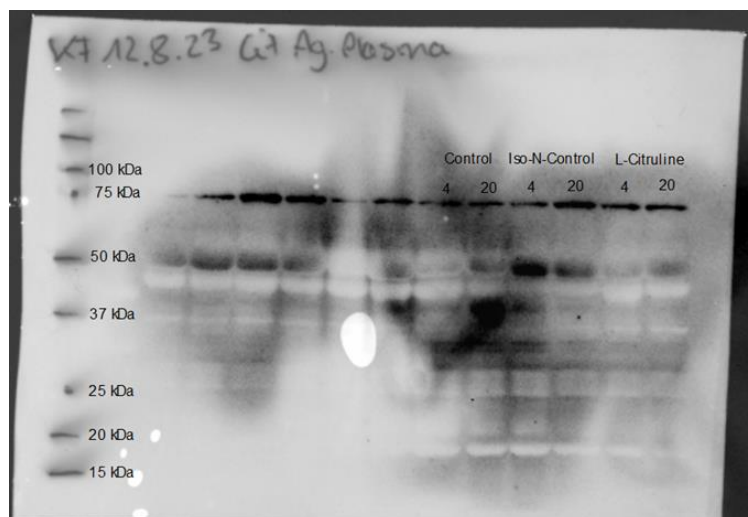

Representative picture

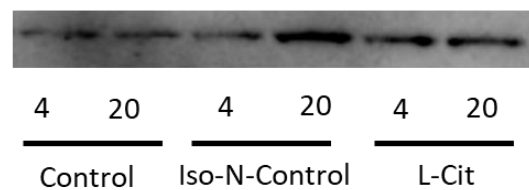

**Figure S7.** Uncropped blot and representative picture of I-FABP in western blot of plasma in Figure 6c. L-Cit, L-Citrulline; Iso-N-control, hydrolyzed soy protein.

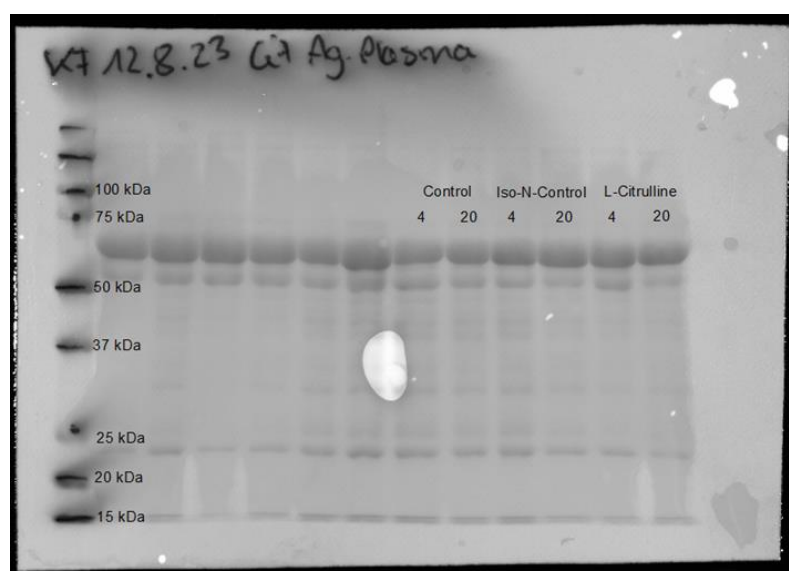

Representative picture

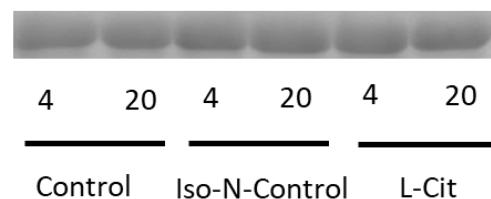

**Figure S8.** Ponceau and representative picture of Ponceau of I-FABP in Figure 6c. L-Cit, L-Citrulline; Iso-N-control, hydrolyzed soy protein.
